# Supplementary material for: Default mode-visual network hypoconnectivity in an autism subtype with pronounced social visual engagement difficulties
Source: eLife. 2019 Dec 17;8:e47427. doi: 10.7554/eLife.47427 (PMC6917498; doi:10.7554/eLife.47427)
Supplement: Supplementary file 1. — This file shows statistics for linear mixed effect models for longitudinal behavioral analyses. Each behavioral measure used as the dependent variable (e.g., ADOS, Mullen, and Vineland subscales) is noted at the top of each table. Degrees of freedom, F-statistics, and p-values are reported for main effects of age, subgroup and the age*subgroup interaction. Red stars indicate effects that pass FDR q < 0.05 for multiple comparisons. [file elife-47427-supp1.xlsx]

## Sheet: ASD Subgroup Pheno Trajectories
	ADOS Social-Communication						Vineland Communication
	numDF	denDF	F-value	p-value			numDF	denDF	F-value	p-value		* FDR q<0.05
Age	1	181	0.5492	0.4596		Age	1	185	1.5146	0.22
Subgroup	1	120	9.0747	0.0032	*	Subgroup	1	120	17.1428	0.0001	*
Age*Subgroup	1	181	3.4188	0.0661		Age*Subgroup	1	185	0.179	0.6727
	ADOS Restricted Repetitive Behavior						Vineland Socialization
	numDF	denDF	F-value	p-value			numDF	denDF	F-value	p-value
Age	1	181	0.1311	0.7177		Age	1	149	35.9801	1.00582e-10	*
Subgroup	1	120	5.0384	0.0266	*	Subgroup	1	76	9.913	0.0021	*
Age*Subgroup	1	181	1.0313	0.3112		Age*Subgroup	1	149	3.2319	0.0738
	Mullen Expressive Language (EL) T-Scores						Vineland Daily Living Skills
	numDF	denDF	F-value	p-value			numDF	denDF	F-value	p-value
Age	1	165	3.4176	0.0663		Age	1	185	15.8833	0.0001	*
Subgroup	1	117	21.1859	1.06566e-05	*	Subgroup	1	120	12.2395	0.0007	*
Age*Subgroup	1	165	1.0749	0.3014		Age*Subgroup	1	185	3.699	0.056
	Mullen Receptive Language (RL) T-Scores						Vineland Motor
	numDF	denDF	F-value	p-value			numDF	denDF	F-value	p-value
Age	1	165	0.7145	0.3992		Age	1	185	46.1024	4.99822e-13	*
Subgroup	1	117	21.9277	7.68843e-06	*	Subgroup	1	120	4.8971	0.0288
Age*Subgroup	1	165	5.2239	0.0236	*	Age*Subgroup	1	185	1.605	0.2068
	Mullen Visual Reception (VR) T-Scores						Vineland Adaptive Behavior
	numDF	denDF	F-value	p-value			numDF	denDF	F-value	p-value
Age	1	165	20.1577	1.33396e-05	*	Age	1	185	13.7482	0.0003	*
Subgroup	1	117	7.9102	0.0058	*	Subgroup	1	120	13.8891	0.0003	*
Age*Subgroup	1	165	5.6397	0.0187	*	Age*Subgroup	1	185	1.678	0.1624
	Mullen Fine Motor (FM) T-Scores
	numDF	denDF	F-value	p-value
Age	1	165	76.6451	2.33147e-15	*
Subgroup	1	117	15.3397	0.0002	*
Age*Subgroup	1	165	0.9043	0.343
