# Supplementary material for: Default mode-visual network hypoconnectivity in an autism subtype with pronounced social visual engagement difficulties
Source: eLife. 2019 Dec 17;8:e47427. doi: 10.7554/eLife.47427 (PMC6917498; doi:10.7554/eLife.47427)
Supplement: Supplementary file 2. — This file shows statistics for case-control or subtype models for each functional connectivity component-pair comparison. Case-control and subtype models report degrees of freedom, F-stats, p-values, and η2, and FDR statistics. Additionally, there are columns reporting the AIC values for the case-control or subtype models. The final set of columns report t-stats, p-values, and effect size (Cohen’s d) for specific pairwise group comparisons. Note that these statistics are estimated based on the full dataset of n = 195 toddlers with rsfMRI scanning data available (with or without eye tracking data). Red color indicates comparisons that pass FDR q < 0.05. [file elife-47427-supp2.xlsx]

## Sheet: casectrl_subtype_allcomps_outpu
compName	df1.CaseCtrl	df2.CaseCtrl	Fstat.CaseCtrl	pval.CaseCtrl	etasq.CaseCtrl	fdr.CaseCtrl	df1.Subtype	df2.Subtype	Fstat.Subtype	pval.Subtype	etasq.Subtype	fdr.Subtype	AIC.CaseCtrl	AIC.Subtype	Delta_AIC	TD_vs_ASD_t	TD_vs_ASD_p	TD_vs_ASD_d	TypSibASD_vs_ASD_t	TypSibASD_vs_ASD_p	TypSibASD_vs_ASD_d	LDDD_vs_ASD_t	LDDD_vs_ASD_p	LDDD_vs_ASD_d	TD_vs_TypSibASD_t	TD_vs_TypSibASD_p	TD_vs_TypSibASD_d	TD_vs_LDDD_t	TD_vs_LDDD_p	TD_vs_LDDD_d	TypSibASD_vs_LDDD_t	TypSibASD_vs_LDDD_p	TypSibASD_vs_LDDD_d
IC02_IC04	3	189	0.249176	0.861855	0.00168273	0.911814	4	157	0.554905	0.695725	0.0102386	0.867221	3.61916	4.29163	0.672464	-0.272279	0.786004	-0.00258107	-0.97387	0.341252	0.16008	-0.00786608	0.993818	0.0155093	0.679005	0.502052	0.151721	-0.133365	0.895155	0.0153994	-0.59734	0.555597	0.138844
IC02_IC05	3	189	1.85658	0.138417	0.0218084	0.414755	4	157	1.74585	0.1426	0.0303828	0.499232	82.3083	82.8823	0.57404	-0.764118	0.446625	0.188521	-1.5039	0.150099	0.48782	-1.34059	0.198333	0.326488	1.03013	0.314029	0.305421	0.897798	0.379924	0.12077	-0.0723124	0.942853	0.125122
IC02_IC06	3	189	1.0364	0.37765	0.0143837	0.631586	4	157	1.52173	0.198425	0.033317	0.503439	148.703	147.495	1.20791	0.688043	0.492903	-0.127182	-0.673977	0.50798	0.195222	1.27836	0.218267	-0.331444	1.04788	0.304506	0.33329	-0.872257	0.393314	-0.191625	-1.50222	0.144534	0.527828
IC02_IC09	3	189	0.379785	0.767685	0.00793667	0.863646	4	157	0.261283	0.902389	0.00827741	0.944361	122.941	124.941	1.99962	-0.721678	0.472189	0.153966	-0.531888	0.601581	0.238349	-0.661079	0.517759	0.227524	0.174625	0.863077	0.08052	0.279201	0.782971	0.0630976	0.0724733	0.942723	0.0121209
IC02_IC10	3	189	5.98794	0.000641165	0.0887517	0.0103067	4	157	5.24642	0.000541825	0.118932	0.0121911	-47.6016	-51.3296	3.72803	4.08834	7.68506e-05	-0.661804	2.52891	0.0188935	-0.605499	1.66498	0.114217	-0.513482	0.218201	0.828998	0.0458816	0.271787	0.788833	0.0995288	0.102543	0.919155	-0.0708647
IC02_IC11	3	189	0.656854	0.579592	0.00898354	0.736945	4	157	1.27982	0.280243	0.0287701	0.630547	106.754	107.019	0.264217	-0.510217	0.611079	0.0581975	-0.740066	0.468298	0.157981	-1.40257	0.177032	0.369359	0.377459	0.708885	0.0872264	0.935407	0.357767	0.310359	0.416561	0.680088	-0.205376
IC02_IC21	3	189	1.29807	0.276438	0.0280221	0.592367	4	157	1.60806	0.174898	0.0388379	0.502489	39.3544	38.4712	0.883186	1.91074	0.0585241	-0.393558	-0.0751849	0.940754	-0.150542	0.261587	0.796758	-0.151059	1.30705	0.202293	0.246002	0.69658	0.494285	0.217815	-0.271869	0.787892	0.00351479
IC02_IC26	3	189	3.1835	0.0250785	0.0436369	0.17124	4	157	1.9292	0.108199	0.0437531	0.499232	-169.978	-168.124	1.85442	0.393318	0.694949	-0.0484779	3.25085	0.00410943	-0.851835	0.738128	0.471602	-0.308303	-2.73761	0.010855	-0.728931	-0.563637	0.580184	-0.17938	1.06604	0.297762	-0.363696
IC02_IC28	3	189	0.775578	0.508962	0.0158064	0.736945	4	157	0.757607	0.554388	0.0248006	0.787972	2.60978	4.33977	1.72999	0.911019	0.364226	-0.148038	-0.152659	0.880347	0.0919179	-1.14146	0.267346	0.348597	0.595897	0.557652	0.23855	1.64824	0.112057	0.574844	0.607574	0.54853	-0.246787
IC04_IC05	3	189	0.070115	0.97583	0.00109286	0.97583	4	157	0.42839	0.787975	0.0098118	0.931362	-61.8221	-60.8554	0.966764	-0.169334	0.865864	0.0453556	0.266922	0.792352	-0.0411291	0.272581	0.78832	-0.0723492	-0.347911	0.730846	-0.0836028	-0.351361	0.728595	-0.114594	-0.0111901	0.991149	0.0310489
IC04_IC06	3	189	1.74099	0.160061	0.0278341	0.422379	4	157	1.4016	0.235933	0.0356493	0.558788	-22.4585	-20.7872	1.67137	-1.20259	0.231553	0.219546	-1.98822	0.0612975	0.563841	-0.070217	0.944839	-0.0430105	1.27589	0.215373	0.375047	-0.51525	0.612297	-0.231102	-1.353	0.186734	0.559659
IC04_IC09	3	189	0.717247	0.542818	0.00685196	0.736945	4	157	0.744406	0.563121	0.00989113	0.787972	-73.156	-71.2866	1.86932	-0.385944	0.7005	0.0356146	-1.22668	0.236284	0.295904	0.112569	0.911713	-0.119073	0.924233	0.3646	0.209517	-0.320217	0.751555	-0.13665	-1.02081	0.315814	0.341798
IC04_IC10	3	189	0.43773	0.726261	0.0069293	0.857986	4	157	0.305094	0.874236	0.00732598	0.936682	-35.9982	-34.0539	1.94429	0.604626	0.546781	-0.145825	-0.595916	0.558359	0.103932	0.536532	0.598712	-0.169575	0.894412	0.380016	0.242992	-0.210329	0.835522	-0.0219248	-0.835925	0.410247	0.25481
IC04_IC11	3	189	1.69778	0.168951	0.0205292	0.422379	4	157	1.03598	0.390524	0.0210728	0.732232	2.1245	2.89921	0.774703	1.14517	0.254847	-0.20305	1.08231	0.292688	-0.272586	1.95769	0.0661686	-0.484584	-0.358301	0.723188	-0.0635369	-1.16978	0.254052	-0.265779	-0.649477	0.521145	0.20252
IC04_IC21	3	189	0.206877	0.891551	0.00427751	0.911814	4	157	0.165012	0.95583	0.00394771	0.956553	-35.2788	-33.6423	1.63644	0.379346	0.705132	-0.0887973	0.420294	0.679002	-0.165324	0.749491	0.462412	-0.184969	-0.20261	0.841304	-0.0831152	-0.471202	0.64173	-0.108665	-0.168931	0.867058	0.0157843
IC04_IC26	3	189	1.01936	0.385254	0.0214165	0.631586	4	157	0.906877	0.461505	0.0285501	0.76197	-236.736	-235.223	1.51279	1.25194	0.213492	-0.250989	1.11379	0.280218	-0.441766	-0.101391	0.920277	0.00368279	-0.437041	0.666415	-0.176568	0.909501	0.371078	0.286632	1.01577	0.318938	-0.437606
IC04_IC28	3	189	3.59599	0.0146332	0.0526518	0.164624	4	157	2.5035	0.0445057	0.0608184	0.333793	-106.459	-104.743	1.71598	-1.76607	0.0802569	0.309872	-1.24243	0.23004	0.409102	-2.4104	0.0281401	0.815224	0.313942	0.756619	0.105711	1.52486	0.144021	0.422066	0.992119	0.329509	-0.335749
IC05_IC06	3	189	2.19003	0.0906344	0.0306894	0.414755	4	157	1.91318	0.11086	0.0433162	0.499232	95.0571	97.0543	1.99727	1.90562	0.0590674	-0.295264	-0.360316	0.722659	0.187025	2.17267	0.0414522	-0.400139	1.30414	0.206521	0.518267	-0.827602	0.415825	-0.132033	-1.71093	0.0986498	0.614781
IC05_IC09	3	189	1.84314	0.140781	0.029416	0.414755	4	157	1.63196	0.168851	0.0411631	0.502489	-52.4519	-50.9759	1.47596	-0.697321	0.487245	0.106571	1.8643	0.0772047	-0.523892	-1.27398	0.215513	0.258304	-2.13723	0.0417499	-0.583891	0.57721	0.567406	0.176788	2.46507	0.0203508	-0.896837
IC05_IC10	3	189	6.62772	0.000279347	0.0993843	0.0103067	4	157	5.53048	0.000342867	0.126779	0.0121911	-89.5431	-87.7272	1.81592	2.95087	0.00393447	-0.521974	2.08057	0.0512047	-0.644078	2.47449	0.0255009	-1.05582	-0.254733	0.80105	-0.111054	-1.31878	0.204694	-0.401064	-1.0424	0.308059	0.368247
IC05_IC11	3	189	1.19323	0.313627	0.0143165	0.631586	4	157	1.59356	0.178663	0.0377487	0.502489	99.7363	99.372	0.364275	-1.62316	0.107326	0.241995	-1.71089	0.0981015	0.274636	-0.716778	0.482493	0.180912	0.25743	0.798247	0.0322697	-0.247218	0.807027	-0.0570598	-0.41292	0.683383	0.100604
IC05_IC21	3	189	3.21542	0.0240561	0.0497269	0.17124	4	157	3.35369	0.0115053	0.0773413	0.129434	-78.5924	-79.5264	0.933981	2.18161	0.0319175	-0.42657	-0.935561	0.361434	0.276139	1.7275	0.101025	-0.422175	2.17546	0.0378592	0.576538	-0.0630407	0.950151	0.0604333	-1.97382	0.0580293	0.666614
IC05_IC26	3	189	3.13723	0.0266373	0.0427104	0.17124	4	157	2.71263	0.0320041	0.0604043	0.288037	-255.831	-254.254	1.57686	-0.0494947	0.960641	0.00790328	-1.02296	0.317428	0.212643	-2.4449	0.0264866	0.848796	0.808329	0.423605	0.158275	2.23996	0.0358583	0.627284	1.65408	0.112241	-0.600686
IC05_IC28	3	189	1.00233	0.392987	0.0130451	0.631586	4	157	0.885496	0.474115	0.0188853	0.76197	-100.827	-98.9786	1.84807	-1.35123	0.179544	0.199554	-0.0781924	0.93849	-0.0249822	0.671442	0.511237	-0.220246	-0.68881	0.497551	-0.215254	-1.28894	0.212502	-0.348602	-0.594469	0.55706	0.171862
IC06_IC09	3	189	0.215495	0.885574	0.00106946	0.911814	4	157	0.35258	0.841945	0.00668571	0.931362	13.3323	14.5116	1.17933	-0.324746	0.745843	0.0604571	0.449898	0.65676	-0.0112197	0.624423	0.538745	-0.0370022	-0.665444	0.51211	-0.091	-0.833992	0.413328	-0.125476	-0.151532	0.88061	0.0363248
IC06_IC10	3	189	1.05942	0.367586	0.0116447	0.631586	4	157	1.08537	0.365718	0.0225384	0.715536	-84.1176	-83.2219	0.895624	0.494665	0.621769	-0.0332722	1.51861	0.14524	-0.379944	-0.334486	0.741572	0.0500413	-1.19682	0.244106	-0.374888	0.622305	0.539725	0.102234	1.47105	0.152258	-0.49202
IC06_IC11	3	189	1.93596	0.125213	0.0155072	0.414755	4	157	1.12659	0.345994	0.015882	0.707716	120.109	122.103	1.99466	-1.87525	0.0633205	0.264261	-2.12851	0.0433765	0.262193	-1.01087	0.324408	0.106926	0.585621	0.562185	-0.00111373	-0.212159	0.83377	-0.161081	-0.640692	0.527103	0.175754
IC06_IC21	3	189	0.650391	0.583629	0.00687291	0.736945	4	157	0.558579	0.693059	0.0105754	0.867221	-65.711	-63.8867	1.82427	-0.817677	0.415535	0.143789	-0.188065	0.852881	0.132675	1.32884	0.19538	-0.137008	-0.274186	0.786295	-0.0125109	-1.79099	0.0802745	-0.400276	-0.912767	0.370892	0.281821
IC06_IC26	3	189	1.84837	0.139857	0.0328056	0.414755	4	157	1.19992	0.31307	0.0349093	0.670865	-223.19	-222.636	0.553697	1.90066	0.0602243	-0.35351	1.75405	0.0940779	-0.478221	0.0646769	0.949136	-0.0195375	-0.344557	0.732883	-0.109945	1.07923	0.291058	0.338601	1.20965	0.236431	-0.482539
IC06_IC28	3	189	1.87143	0.135849	0.0247991	0.414755	4	157	0.820839	0.513685	0.0174454	0.787972	-85.7249	-83.8388	1.88613	-1.81547	0.072275	0.303245	-0.47426	0.64022	0.0635407	-1.75015	0.0973859	0.431471	-0.725201	0.474431	-0.241854	0.645376	0.52538	0.122347	1.10259	0.279718	-0.376385
IC09_IC10	3	189	5.93476	0.000687115	0.0876049	0.0103067	4	157	3.88094	0.00492041	0.0886624	0.0738061	19.2072	20.2978	1.09063	3.60818	0.000492682	-0.662504	1.60515	0.122955	-0.407687	2.27621	0.0357412	-0.633627	1.09186	0.282808	0.27627	-0.0534651	0.957817	0.0470691	-0.863412	0.395683	0.254292
IC09_IC11	3	189	1.51685	0.211534	0.0217104	0.501002	4	157	1.7578	0.140077	0.0430135	0.499232	72.4416	74.1364	1.69482	1.91671	0.0581523	-0.318728	1.08028	0.290989	-0.198883	0.0346632	0.972682	0.0195575	0.461362	0.647337	0.130925	1.30553	0.201506	0.389727	0.790617	0.435678	-0.265532
IC09_IC21	3	189	2.52563	0.0588965	0.0453681	0.331293	4	157	1.81411	0.128743	0.0476376	0.499232	-60.6583	-58.6862	1.97201	1.12776	0.261734	-0.209555	0.899077	0.377664	-0.283081	2.5046	0.0221948	-0.769673	-0.0537827	0.95747	-0.0822072	-1.80919	0.0850932	-0.572093	-1.59588	0.122851	0.56435
IC09_IC26	3	189	0.413373	0.743588	0.004132	0.857986	4	157	0.712018	0.584872	0.0117684	0.787972	-137.026	-136.299	0.727132	0.544366	0.58711	-0.0514198	0.912732	0.372001	-0.221152	-0.295386	0.771392	0.0504747	-0.587942	0.562578	-0.196878	0.519319	0.610184	0.0821144	0.820396	0.419597	-0.245659
IC09_IC28	3	189	1.80627	0.147469	0.0248749	0.414755	4	157	2.13114	0.0794499	0.0487567	0.499232	-42.0492	-40.3314	1.71786	-2.34546	0.0204547	0.358653	-0.882691	0.387638	0.179891	-1.10254	0.285094	0.255146	-0.436549	0.666802	-0.194753	-0.0380588	0.970055	-0.0744625	0.277343	0.783565	-0.0806538
IC10_IC11	3	189	1.13858	0.33475	0.0177309	0.631586	4	157	1.73827	0.144222	0.0425331	0.499232	-8.80583	-12.0768	3.27092	1.34484	0.181518	-0.22813	0.88711	0.385761	-0.24974	1.67412	0.109188	-0.392027	-0.0483537	0.961824	-0.0196248	-0.626138	0.536332	-0.182626	-0.433443	0.667988	0.148244
IC10_IC21	3	189	0.297501	0.827177	0.00237851	0.907877	4	157	0.163491	0.956553	0.00448128	0.956553	-52.959	-51.2482	1.71081	-0.736701	0.462861	0.0908851	-0.739075	0.468126	0.118627	-0.0335953	0.973529	-0.0125273	0.234867	0.816146	0.0289449	-0.450826	0.655854	-0.120955	-0.561368	0.578864	0.151235
IC10_IC26	3	189	0.898506	0.443033	0.0147961	0.687465	4	157	0.733333	0.570506	0.0193851	0.787972	-266.071	-264.149	1.92182	1.34617	0.181333	-0.230729	0.220474	0.827123	-0.0664821	0.933366	0.363945	-0.334417	0.915307	0.364965	0.172641	-0.194419	0.847735	-0.0874803	-0.757539	0.457286	0.292284
IC10_IC28	3	189	1.11609	0.343805	0.0154171	0.631586	4	157	0.696636	0.595356	0.0166283	0.787972	-22.2105	-20.7399	1.47057	0.434876	0.664443	-0.0789696	1.65381	0.113874	-0.43105	0.889749	0.385704	-0.231221	-1.34258	0.192516	-0.386489	-0.640642	0.52915	-0.152441	0.462734	0.647104	-0.19395
IC11_IC21	3	189	1.82247	0.144493	0.0276903	0.414755	4	157	1.51157	0.201376	0.0382839	0.503439	-57.6016	-56.7788	0.822812	-0.46396	0.643751	0.0746778	0.628543	0.537709	-0.220433	1.82235	0.0866548	-0.610152	-0.824994	0.418027	-0.2562	-1.94384	0.0654499	-0.568566	-0.882673	0.384682	0.311174
IC11_IC26	3	189	0.424253	0.735831	0.00640597	0.857986	4	157	0.343007	0.848574	0.00825462	0.931362	-143.994	-142.248	1.74618	-0.640635	0.523197	0.115806	0.379526	0.708823	-0.15234	-0.756974	0.459112	0.160963	-0.67218	0.50873	-0.248182	0.35317	0.727277	0.0415821	0.818787	0.419706	-0.264244
IC11_IC28	3	189	0.640958	0.589556	0.0109293	0.736945	4	157	0.392345	0.813906	0.0110033	0.931362	4.60149	6.59243	1.99094	1.34252	0.182154	-0.232979	-0.149464	0.88277	0.0476504	0.394027	0.698621	-0.0914137	0.864248	0.396608	0.286157	0.232437	0.818733	0.112631	-0.417384	0.679626	0.124762
IC21_IC26	3	189	1.44707	0.230511	0.0213748	0.518649	4	157	0.896977	0.467314	0.0225312	0.76197	-254.287	-252.355	1.93168	-0.441603	0.659751	0.0556612	0.556911	0.583504	-0.199591	-1.42851	0.17273	0.501106	-0.794421	0.433155	-0.239326	1.18362	0.251651	0.330534	1.5774	0.128746	-0.590308
IC21_IC28	3	189	0.67194	0.570244	0.0121662	0.736945	4	157	0.531101	0.713048	0.0159201	0.867221	-52.1184	-50.233	1.88534	-1.30705	0.194482	0.245192	-0.46818	0.644553	0.0920745	0.0122339	0.990391	-0.0644794	-0.47611	0.637186	-0.150329	-0.624924	0.539131	-0.231561	-0.275991	0.784978	0.130885
IC26_IC28	3	189	0.828251	0.479813	0.0162403	0.71972	4	157	0.985848	0.41703	0.0264084	0.750653	-217.477	-216.549	0.927567	1.42632	0.157103	-0.283825	0.455014	0.65395	-0.157401	0.428708	0.671855	-0.0583278	0.522542	0.605128	0.127647	0.801967	0.42699	0.310781	0.120083	0.905327	-0.120941
