# Supplementary material for: Default mode-visual network hypoconnectivity in an autism subtype with pronounced social visual engagement difficulties
Source: eLife. 2019 Dec 17;8:e47427. doi: 10.7554/eLife.47427 (PMC6917498; doi:10.7554/eLife.47427)
Supplement: Supplementary file 3. — This file shows t-statistics, p-values estimated from non-parametric permutation tests, FDR q-values, and standardized effect sizes (Cohen’s d) statistics for each pairwise group comparisons for DMN-OTC, DMN-PVC, and DMN-DAN component pairs. Note that these statistics are estimated based on the dataset of toddlers that had both rsfMRI and eye tracking data available (n = 164). Red color indicates comparisons that pass FDR q < 0.05. [file elife-47427-supp3.xlsx]

## Sheet: Sheet1
DMN-OTC Pairwise Comparisons	t-stat	p-value	FDR q-value	Effect Size (Cohen's d)
GeoPref ASD vs nonGeo ASD	-2.65437	0.0155984	0.0311969	0.728294
GeoPref ASD vs LD_DD	-2.75162	0.0105989	0.0264973	-0.995105
GeoPref ASD vs TD ASDSib	-3.63082	0.00169983	0.00849915	-1.29335
GeoPref ASD vs TD	-4.66311	0.00039996	0.0039996	-1.28242
nonGeo ASD vs LD_DD	-1.13287	0.266473	0.380676	-0.370431
nonGeo ASD vs TD ASDSib	-1.72133	0.0938906	0.156484	-0.464424
nonGeo ASD vs TD	-2.70456	0.00819918	0.0264973	-0.515574
LD_DD vs TD ASDSib	-0.102543	0.912109	0.912109	-0.0641356
LD_DD vs TD	-0.271787	0.787721	0.912109	0.0918566
TD ASDSib vs TD	-0.218201	0.823818	0.912109	0.0454522
FDR q<0.05
DMN-PVC Pairwise Comparisons	t-stat	p-value	FDR q-value	Effect Size (Cohen's d)
GeoPref ASD vs nonGeo ASD	-0.546971	0.59604	0.662267	0.1341
GeoPref ASD vs LD_DD	-2.67988	0.0117988	0.0344966	-1.0067
GeoPref ASD vs TD ASDSib	-2.28015	0.0283972	0.0486618	-0.842687
GeoPref ASD vs TD	-2.64386	0.0120988	0.0344966	-0.712255
nonGeo ASD vs LD_DD	-2.60463	0.0137986	0.0344966	-1.06108
nonGeo ASD vs TD ASDSib	-2.26363	0.0291971	0.0486618	-0.707912
nonGeo ASD vs TD	-3.06787	0.00249975	0.0249975	-0.588646
LD_DD vs TD ASDSib	1.0424	0.310169	0.387711	0.369345
LD_DD vs TD	1.31878	0.20018	0.285971	-0.400245
TD ASDSib vs TD	0.254733	0.805919	0.805919	-0.108569
FDR q<0.05
DMN-DAN Pairwise Comparisons	t-stat	p-value	FDR q-value	Effect Size (Cohen's d)
GeoPref ASD vs nonGeo ASD	-1.03272	0.314769	0.393461	0.273185
GeoPref ASD vs LD_DD	-2.32828	0.0281972	0.0939906	-0.75648
GeoPref ASD vs TD ASDSib	-1.76278	0.0867913	0.173583	-0.640388
GeoPref ASD vs TD	-2.85166	0.0089991	0.0449955	-0.810999
nonGeo ASD vs LD_DD	-1.934	0.0630937	0.157734	-0.510519
nonGeo ASD vs TD ASDSib	-1.19095	0.240376	0.393461	-0.311743
nonGeo ASD vs TD	-2.86843	0.00549945	0.0449955	-0.581673
LD_DD vs TD ASDSib	0.863412	0.40156	0.446178	0.233533
LD_DD vs TD	0.0534651	0.956804	0.956804	0.0857867
TD ASDSib vs TD	-1.09186	0.282772	0.393461	0.366445
FDR q<0.05
FDR q<0.1
